# Supplementary material for: Synthesis, characterization and cytotoxicity evaluation of a novel magnetic nanocomposite with iron oxide deposited on cellulose nanofibers with nickel (Fe 3 O 4 @NFC@ONSM-Ni)
Source: Royal Society of Chemistry journal article supplement (doi:10.1039/d1ra01256h), 2021-01-01

## Supplementary Information

### Synthesis, characterization and cytotoxicity evaluation of a novel Magnetic Nanocomposite with Iron Oxide Deposited on Cellulose Nanofibers with nickel ( $\text{Fe}_3\text{O}_4@\text{NFC}@\text{ONSM-Ni}$ )

Pouya Ghamari Kargar<sup>a+</sup>, Maryam Noorian<sup>b+</sup>, Elham Chamani<sup>c</sup>, Ghodsieh Bagherzade<sup>a\*</sup>, Zahra Kiani<sup>d\*</sup>

#### Catalyst checking for study over the Hantzsch model reaction

Outset a mixture reaction of aldehyde (1 mmol), dimedone (1 mmol for PHQ), ammonium acetate (1.5 mmol), ethyl acetoacetate (2 mmol for 1,4-DHP or 1 mmol for PHQ), and  $\text{Fe}_3\text{O}_4@\text{NFC}@\text{ONSM-Ni}$  (II) (15 mg) were mixed thoroughly. The flask was heated at 65 °C with concomitant stirring. After completion of the reaction confirmed by TLC (EtOAc:n-hexane), hot ethanol (10 mL) was added and separated solid catalyst by a normal magnet. The spectral data for the selected compounds are as follows:

---

<sup>a+</sup> Department of Chemistry, Faculty of Sciences, University of Birjand, Birjand, 97175- 615, Iran. P.ghamari71@gmail.com

<sup>b+</sup> Student Research Committee, Birjand University of Medical Sciences, Birjand, Iran.

<sup>c</sup> Department of clinical Biochemistry, Birjand University of medical Sciences, Birjand Iran.

<sup>d</sup> Department of pharmacology, Birjand University of Medical Sciences, Birjand, Iran. Kiani.za@gmail.com, tel: +985632381920

Email: gbagherzade@gmail.com, bagherzade@birjand.ac.ir; Fax: +98 56 32345192; Tel: +98 56 32345192 Address here. Email: P.Ghamari71@gmail.com

5-(chloromethyl)-2-hydroxybenzaldehyde (III)

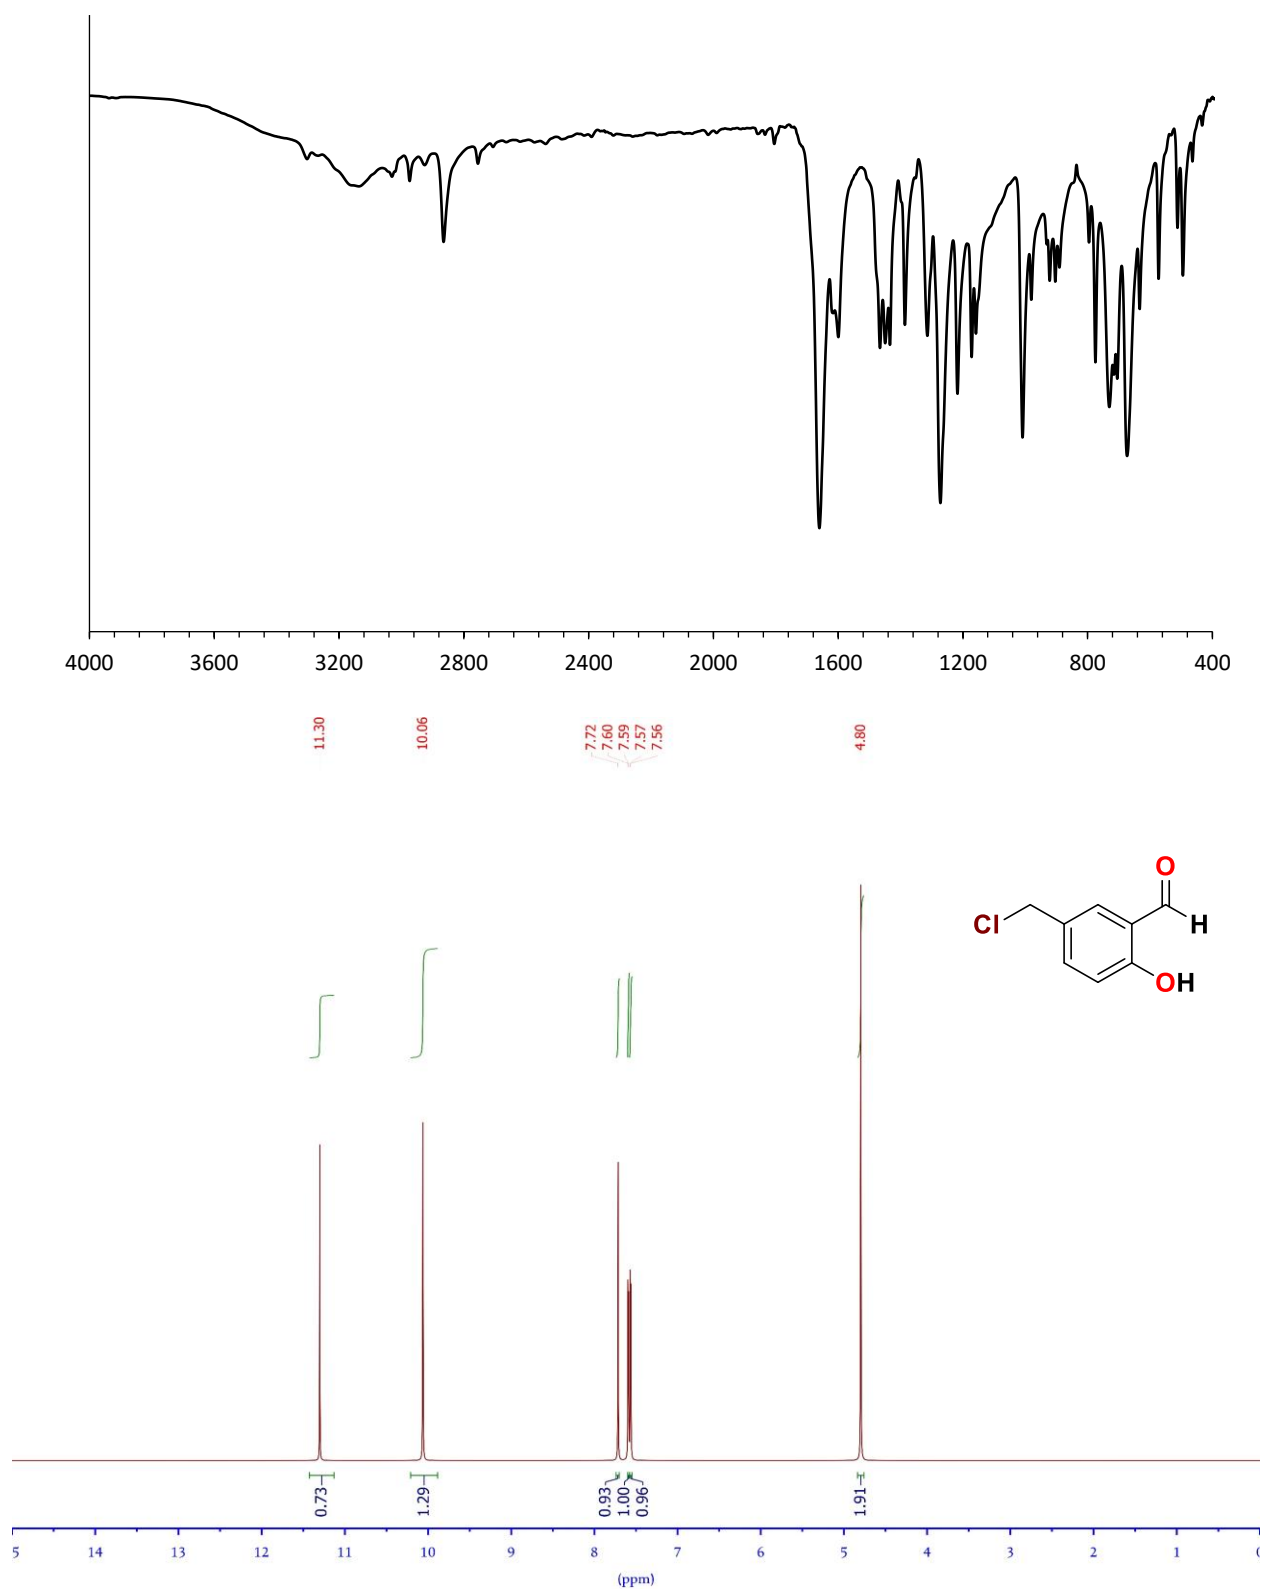

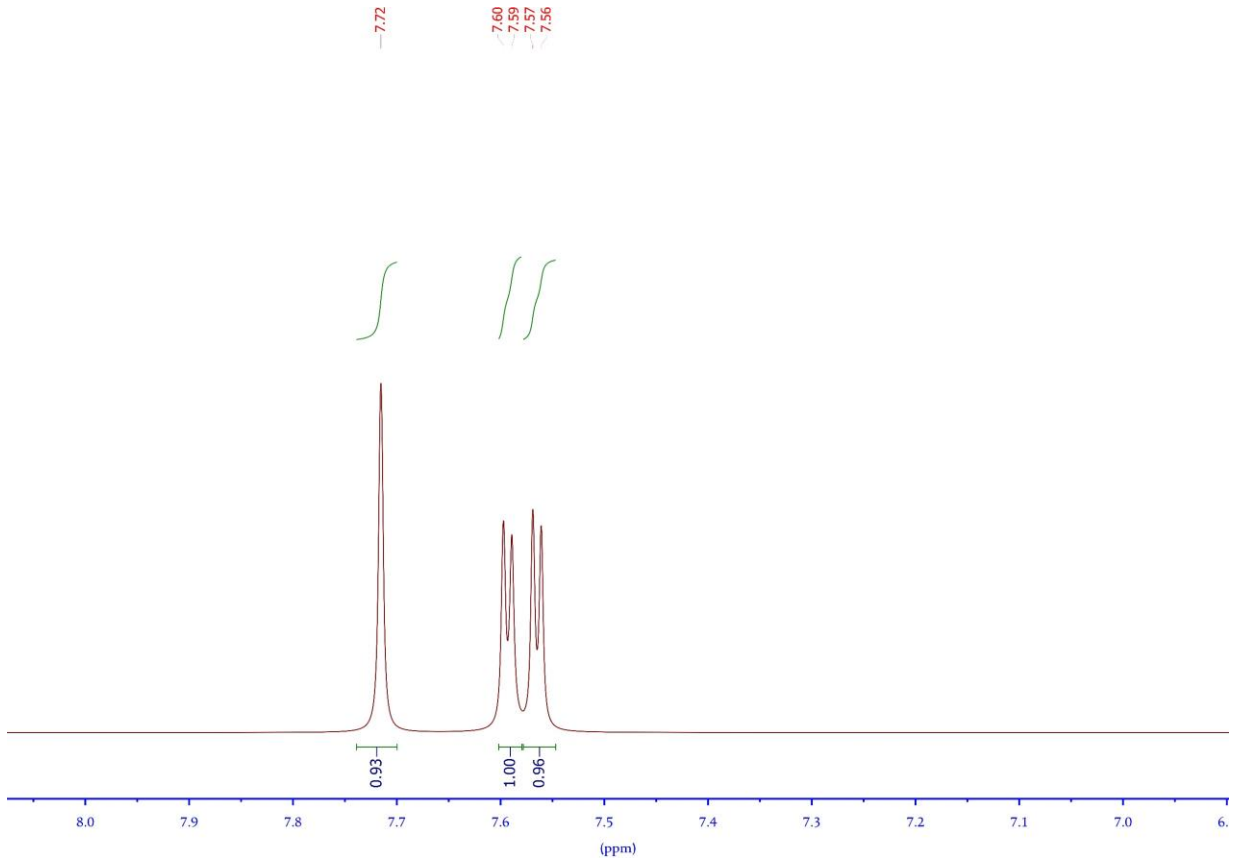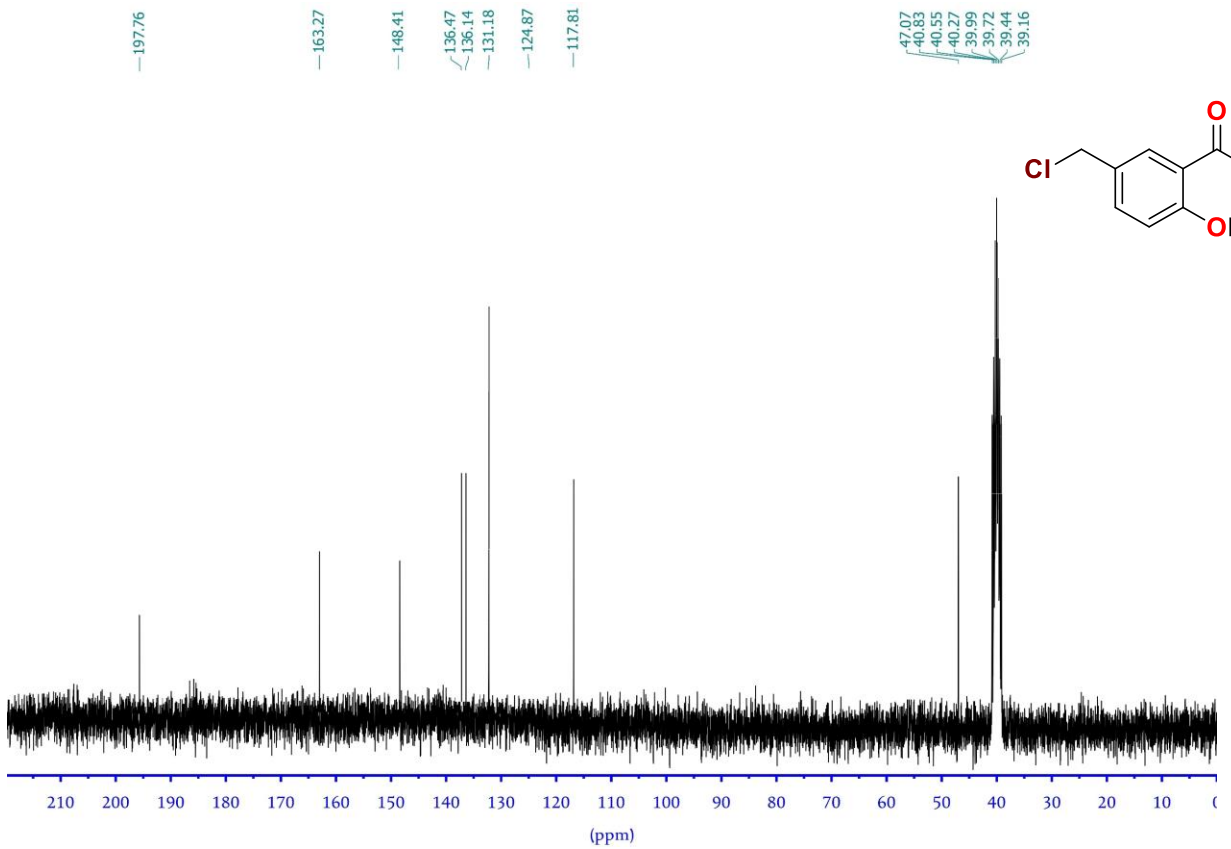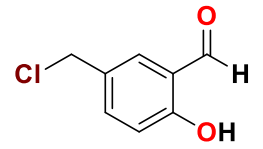

Ethyl 2,7,7-trimethyl-5-oxo-4-phenyl-1,4,5,6,7,8-hexahydroquinoline-3-carboxylate (5a)

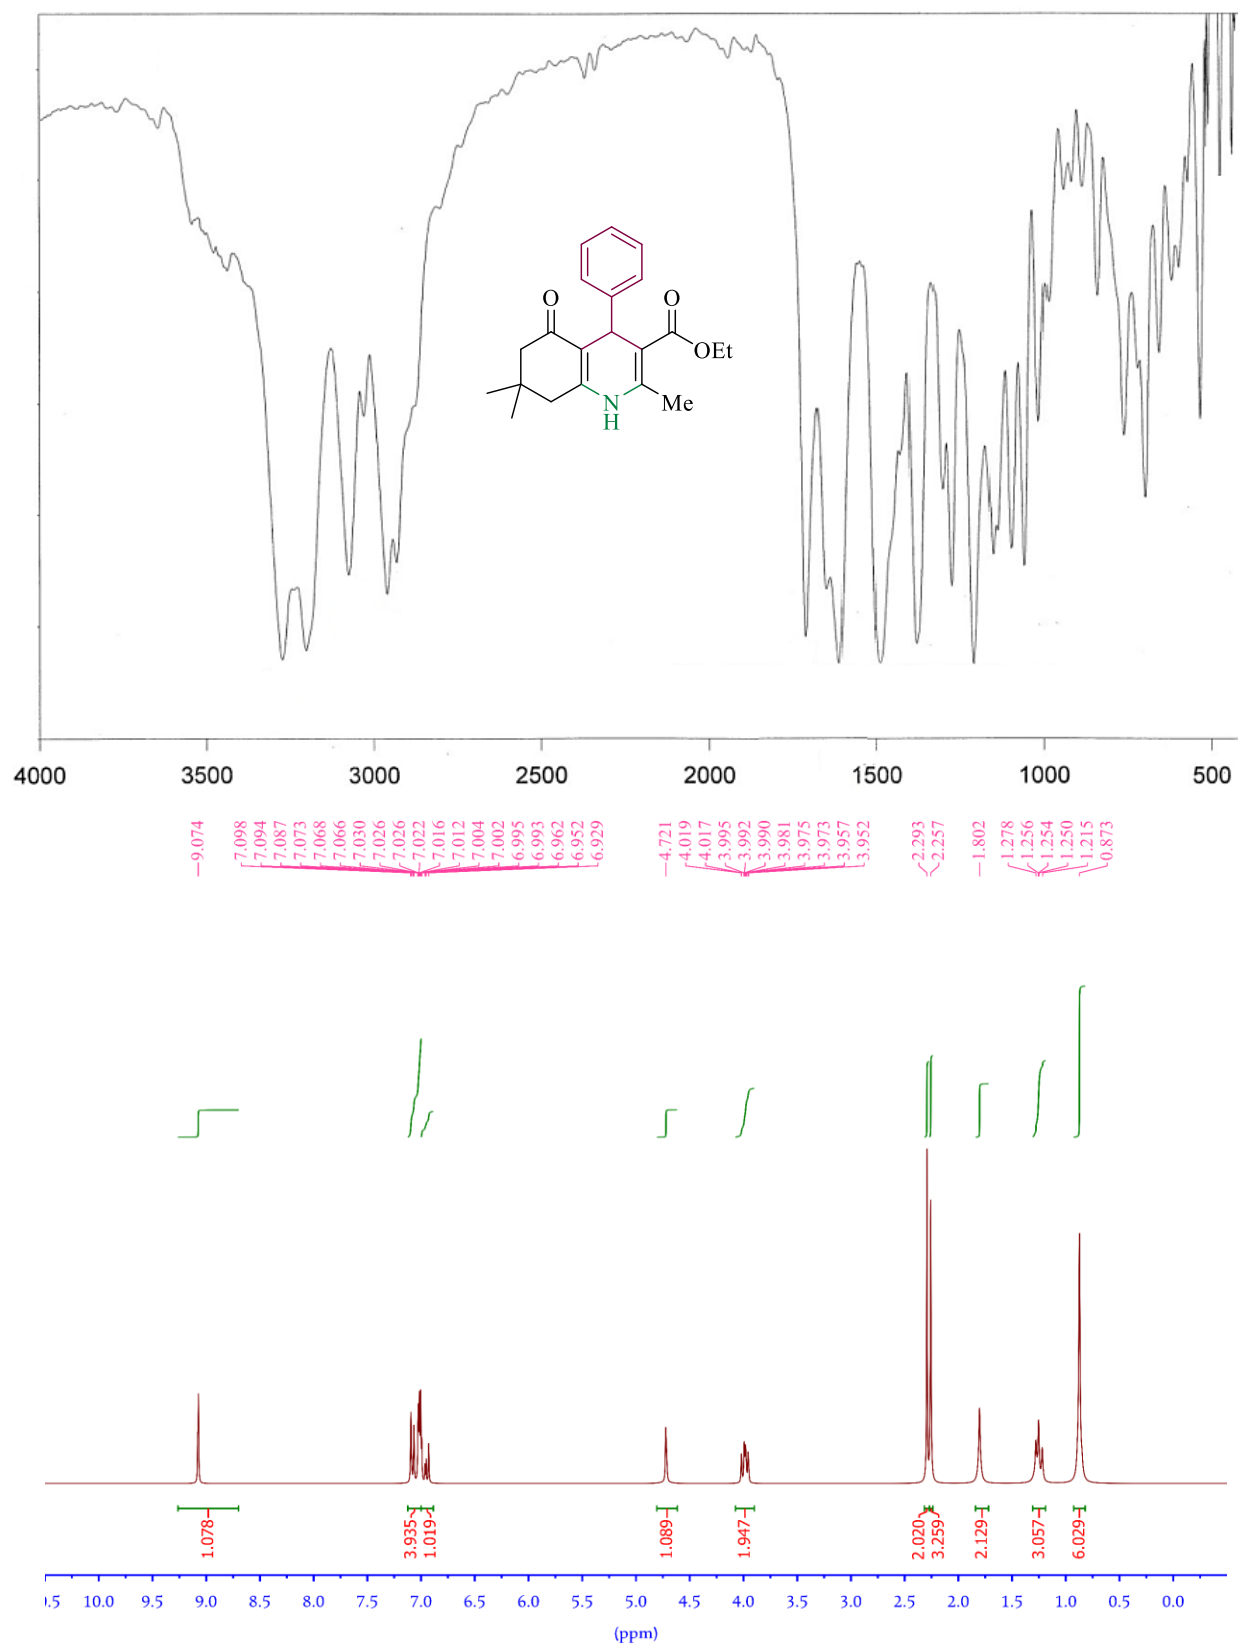

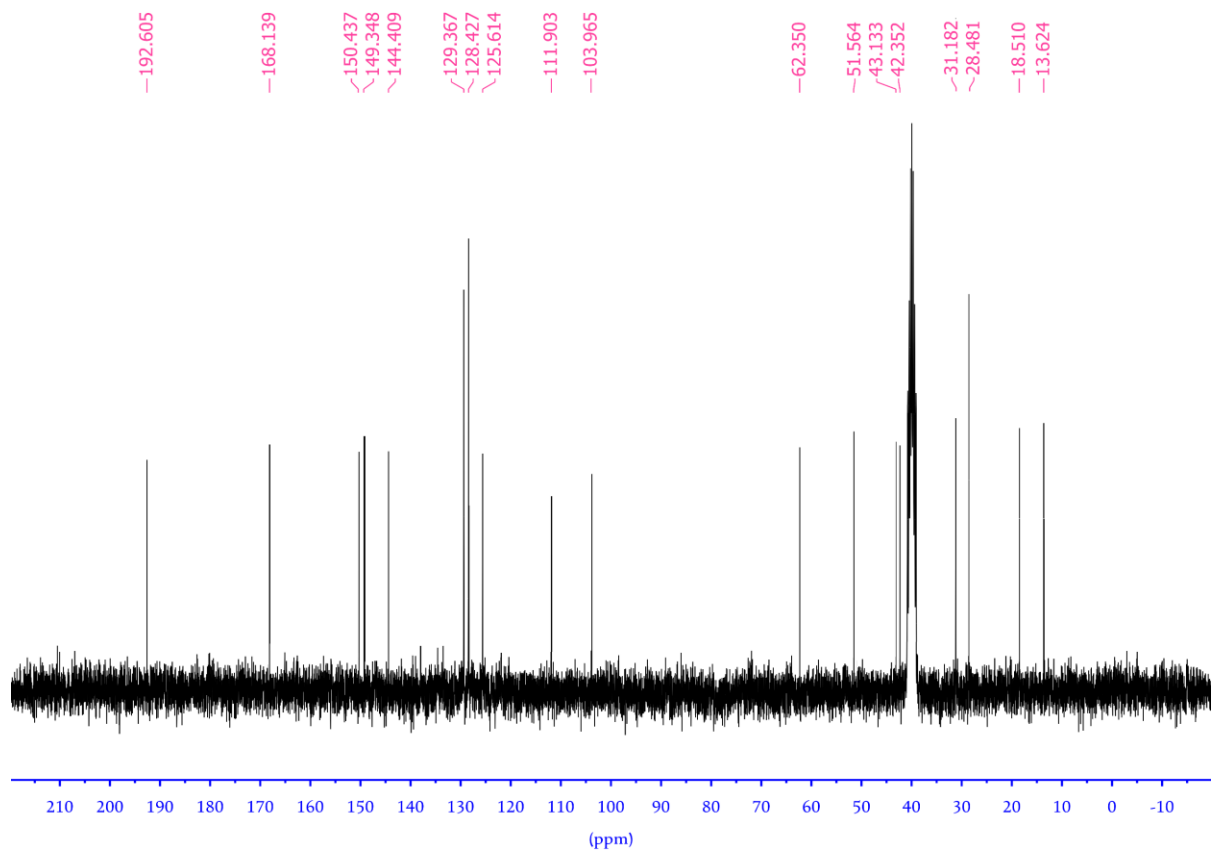

Ethyl 4-(4-chlorophenyl)-2,7,7-trimethyl-5-oxo-1,4,5,6,7,8-hexahydroquinoline-3-carboxylate (5c)

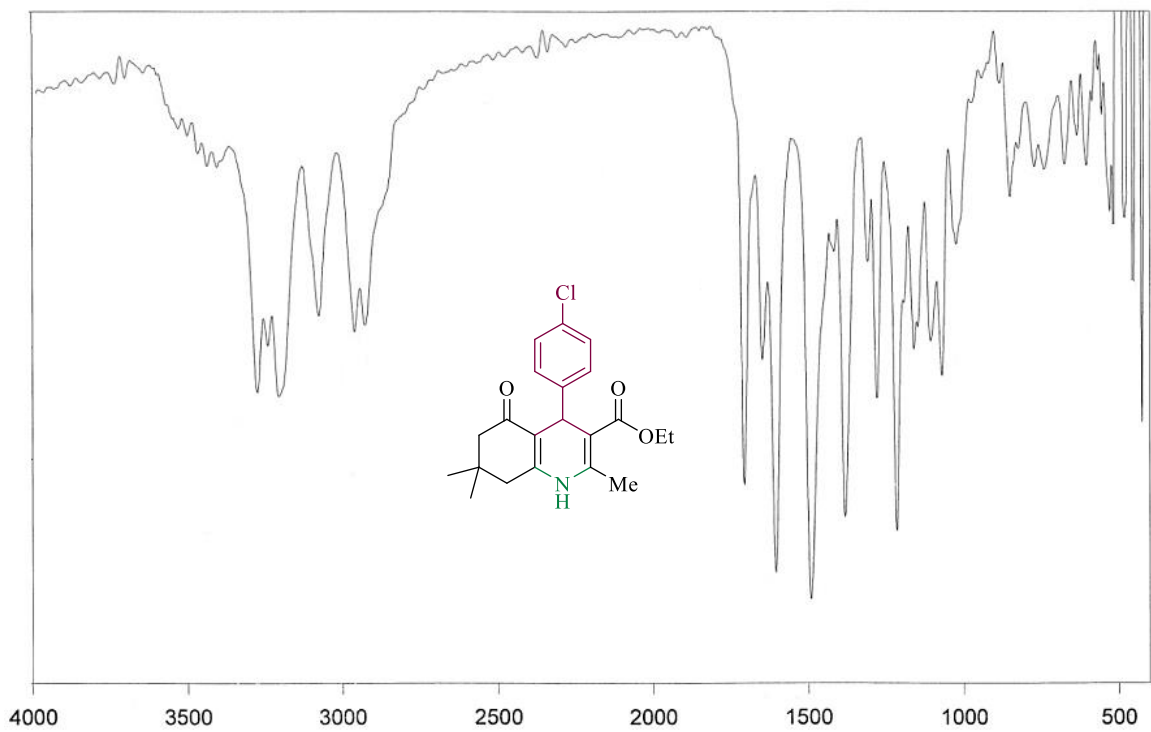

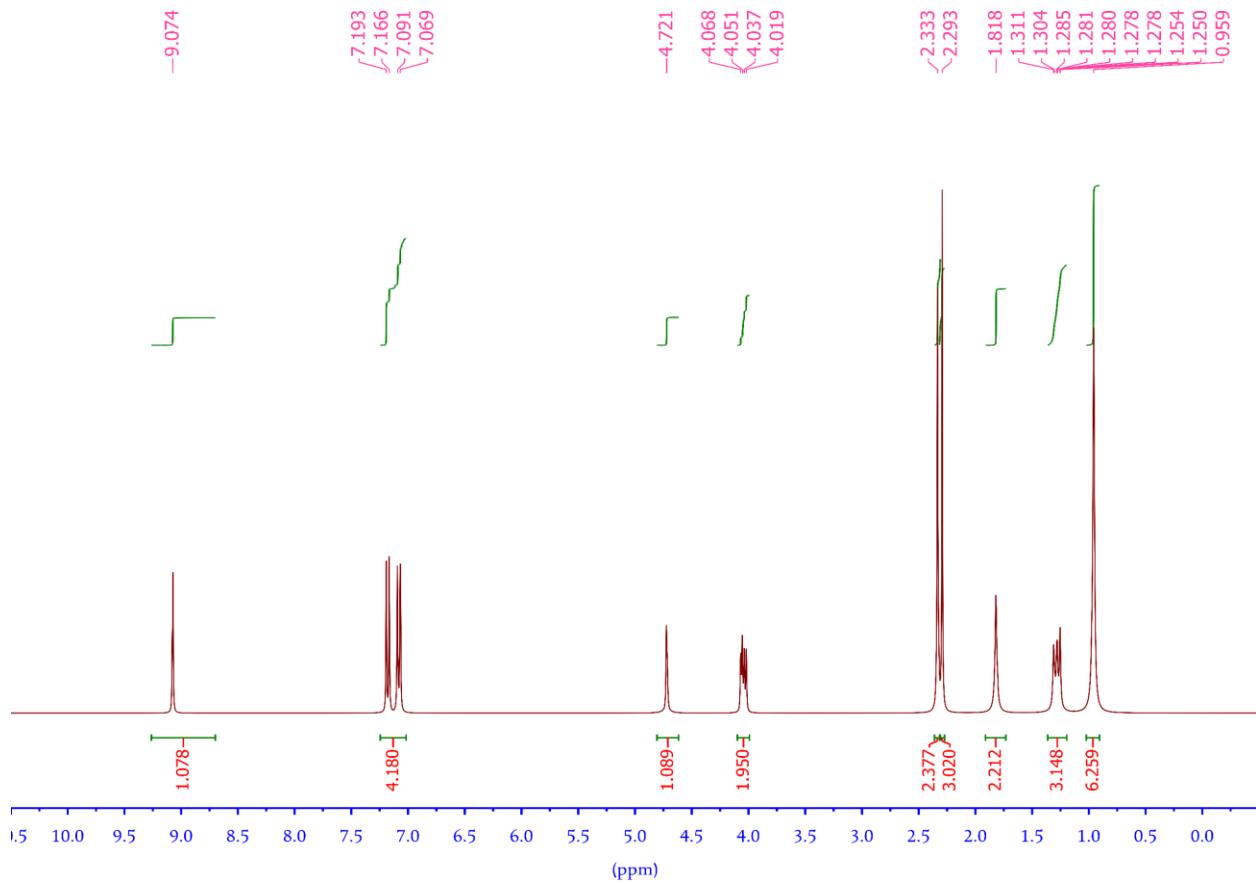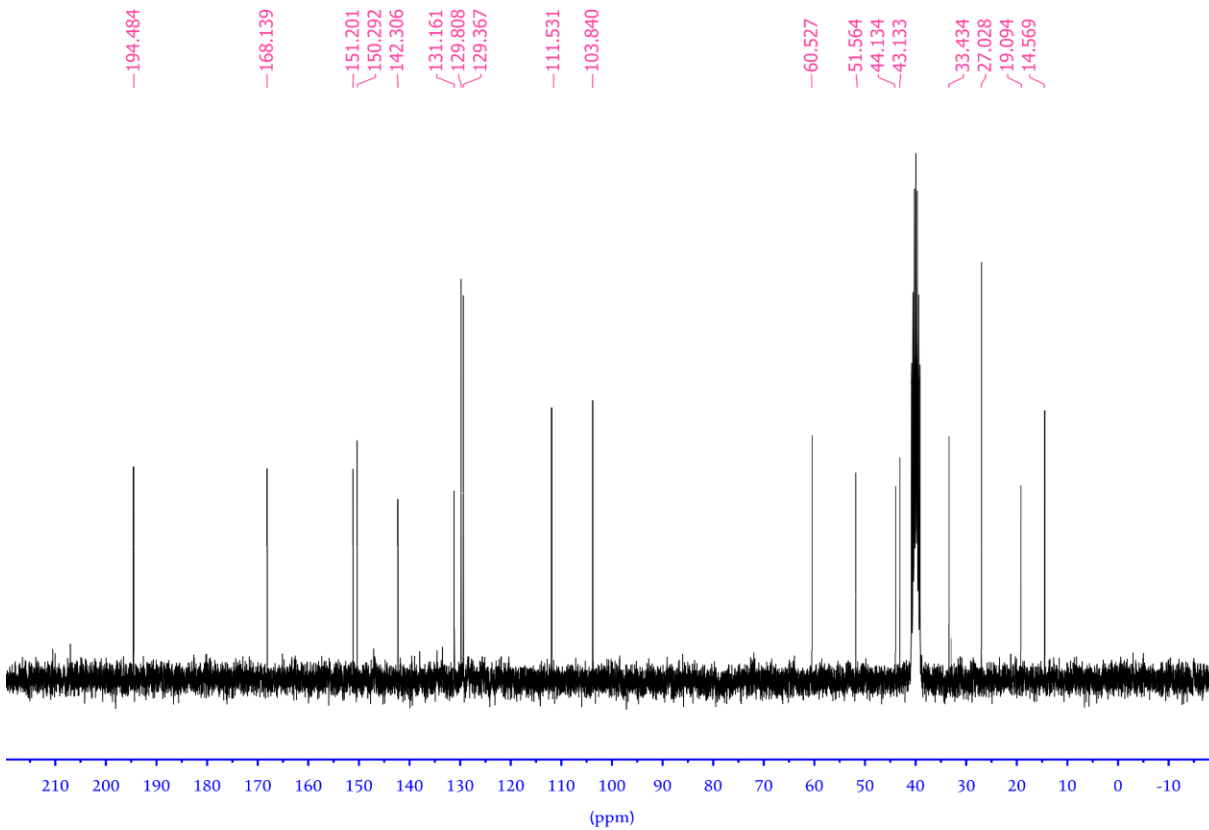

Ethyl 2,7,7-trimethyl-5-oxo-4-(p-tolyl)-1,4,5,6,7,8-hexahydroquinoline-3-carboxylate (5e)

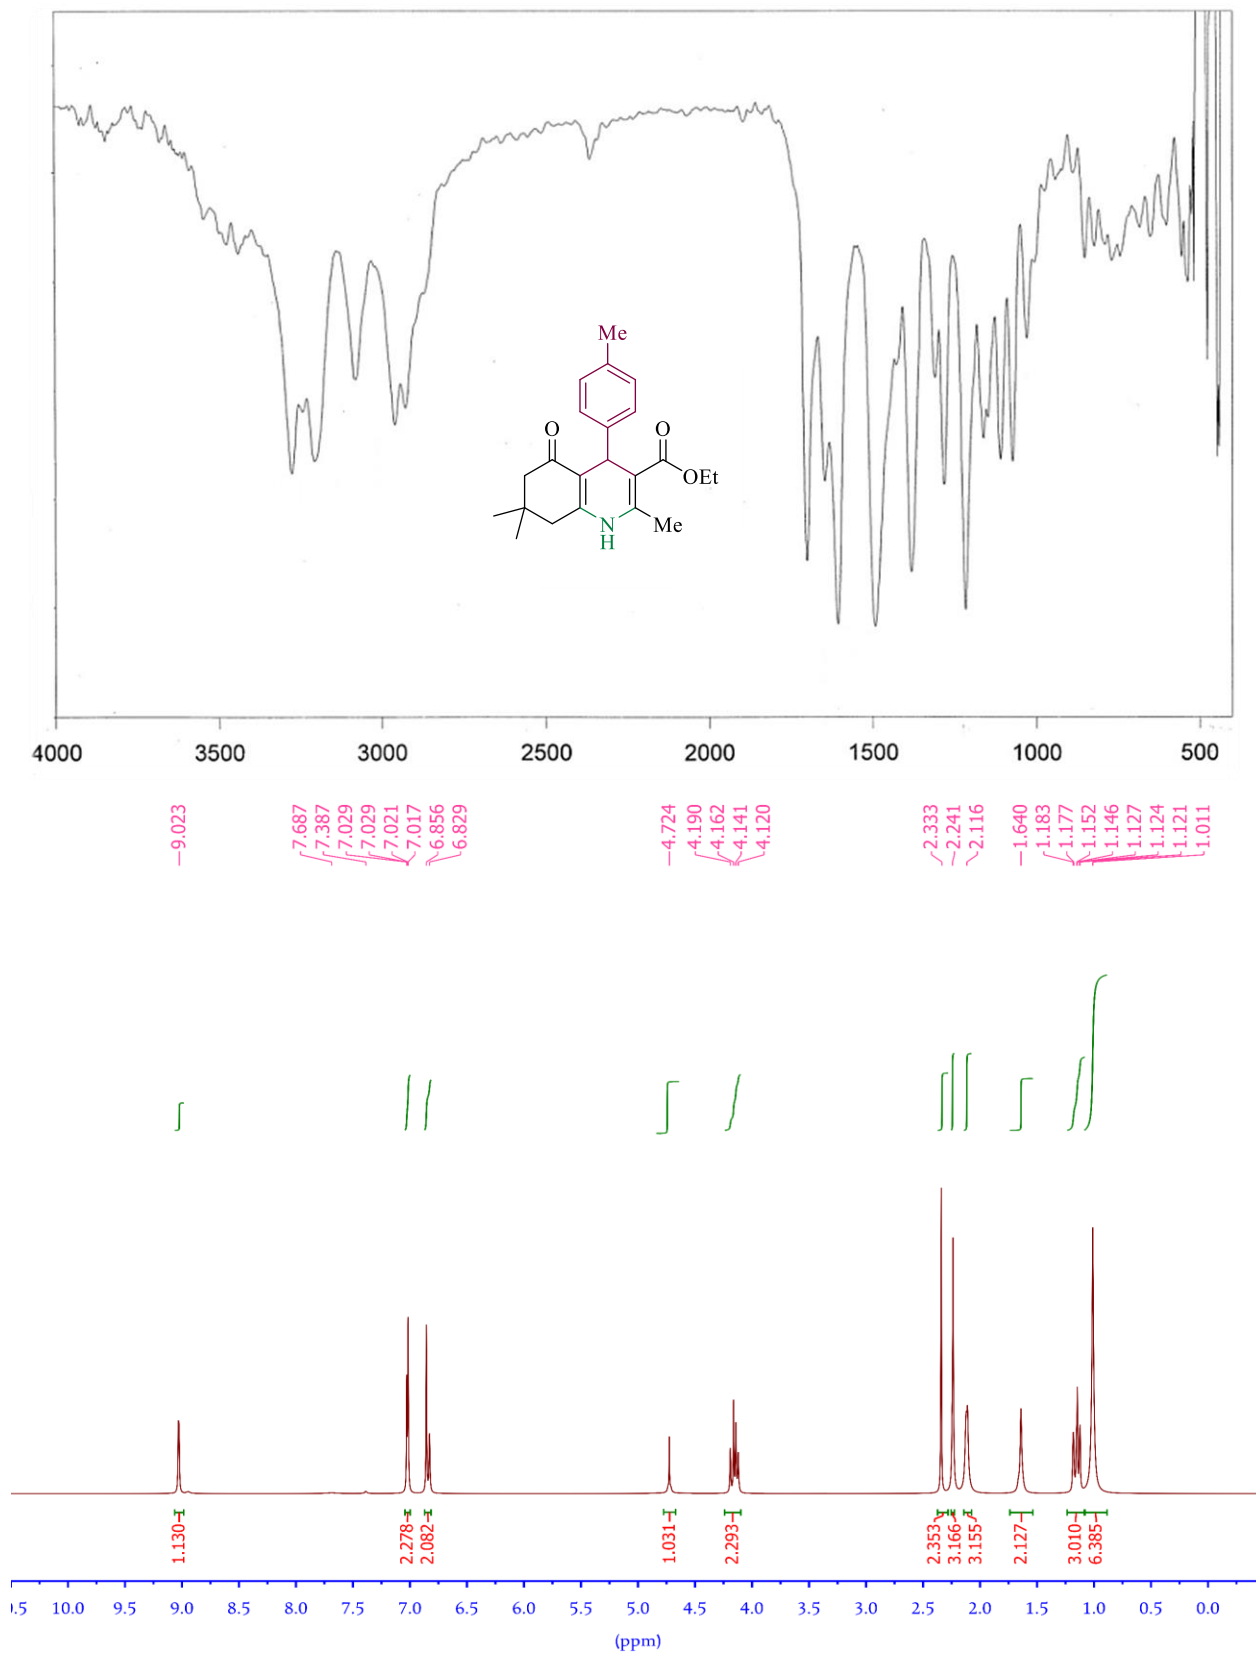

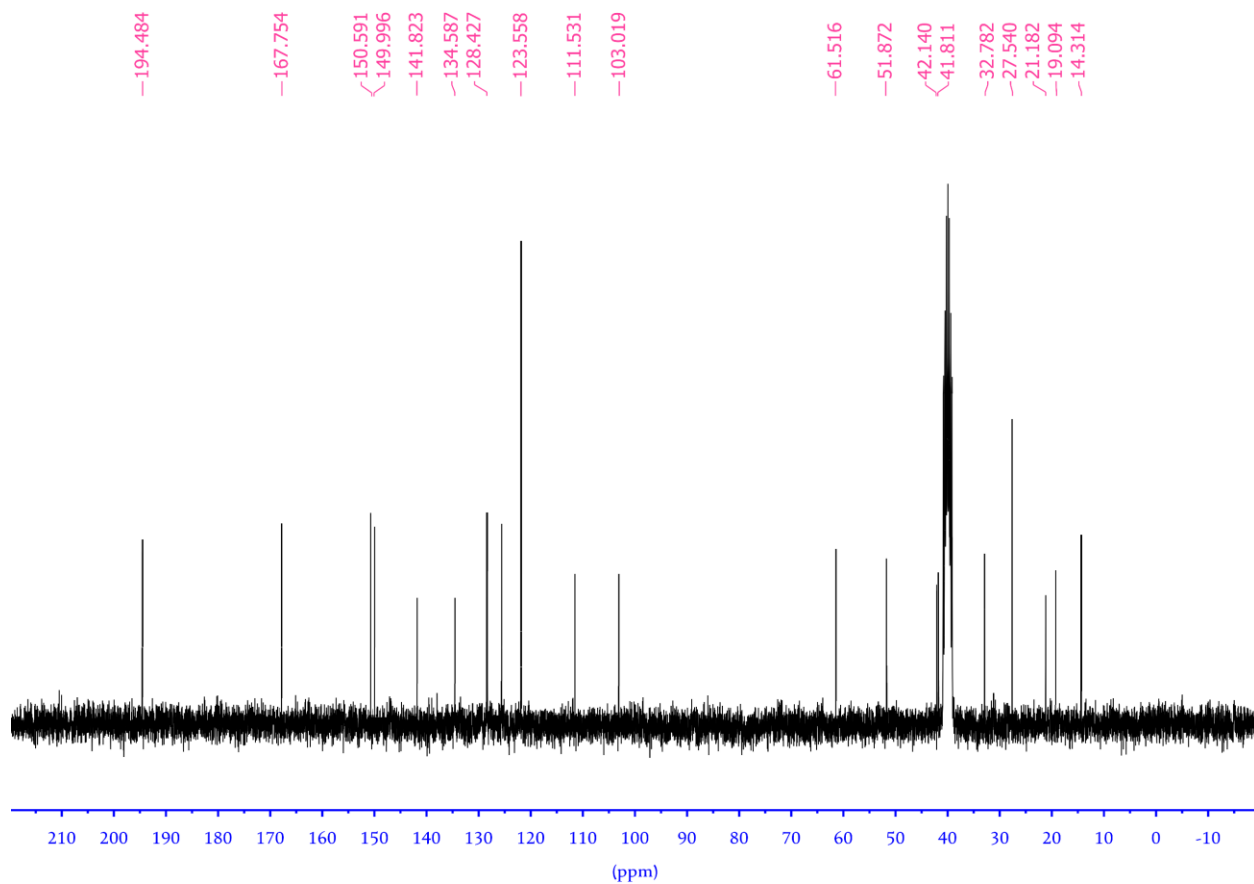

Ethyl 4-(4-methoxyphenyl)-2,7,7-trimethyl-5-oxo-1,4,5,6,7,8-hexahydroquinoline-3-carboxylate (5 f)

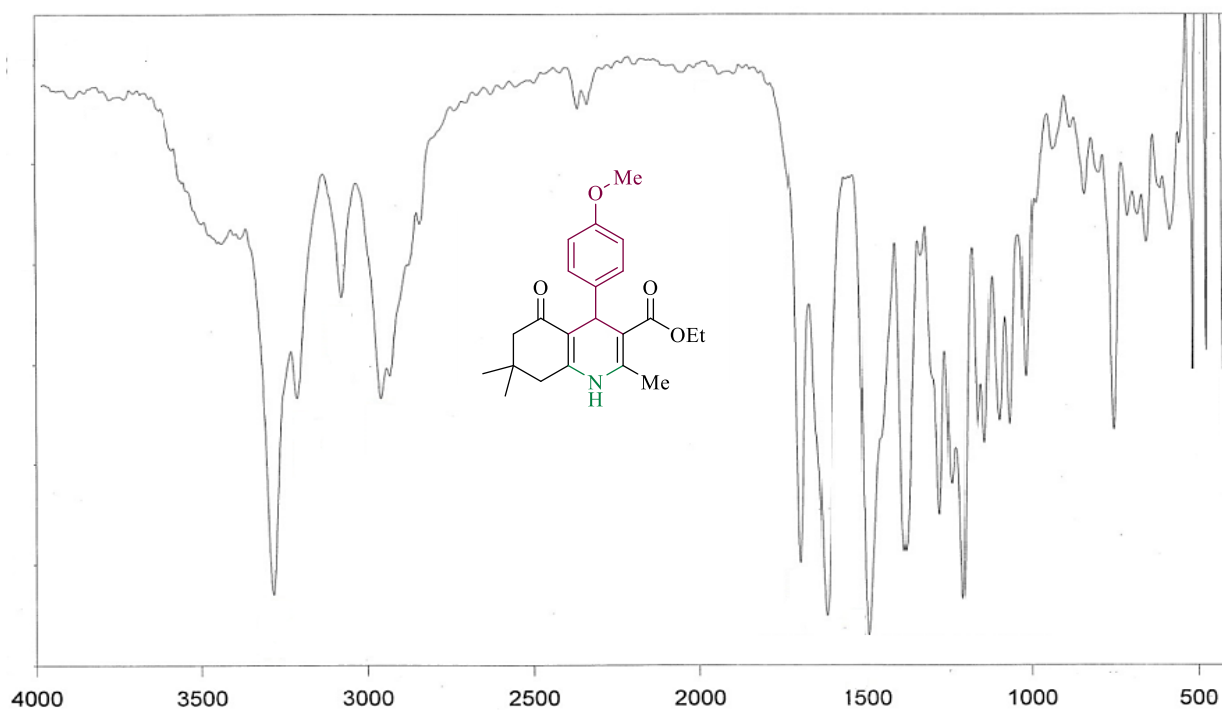



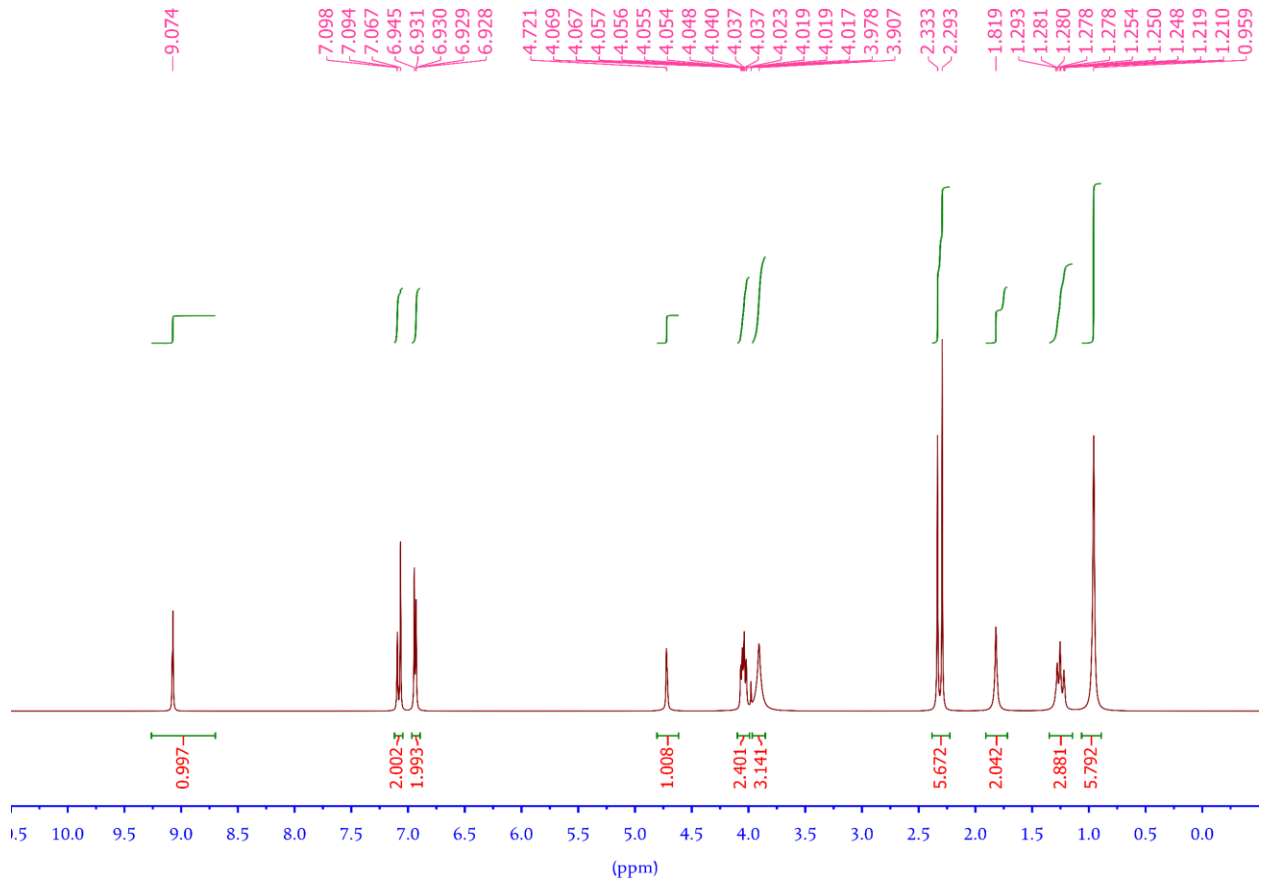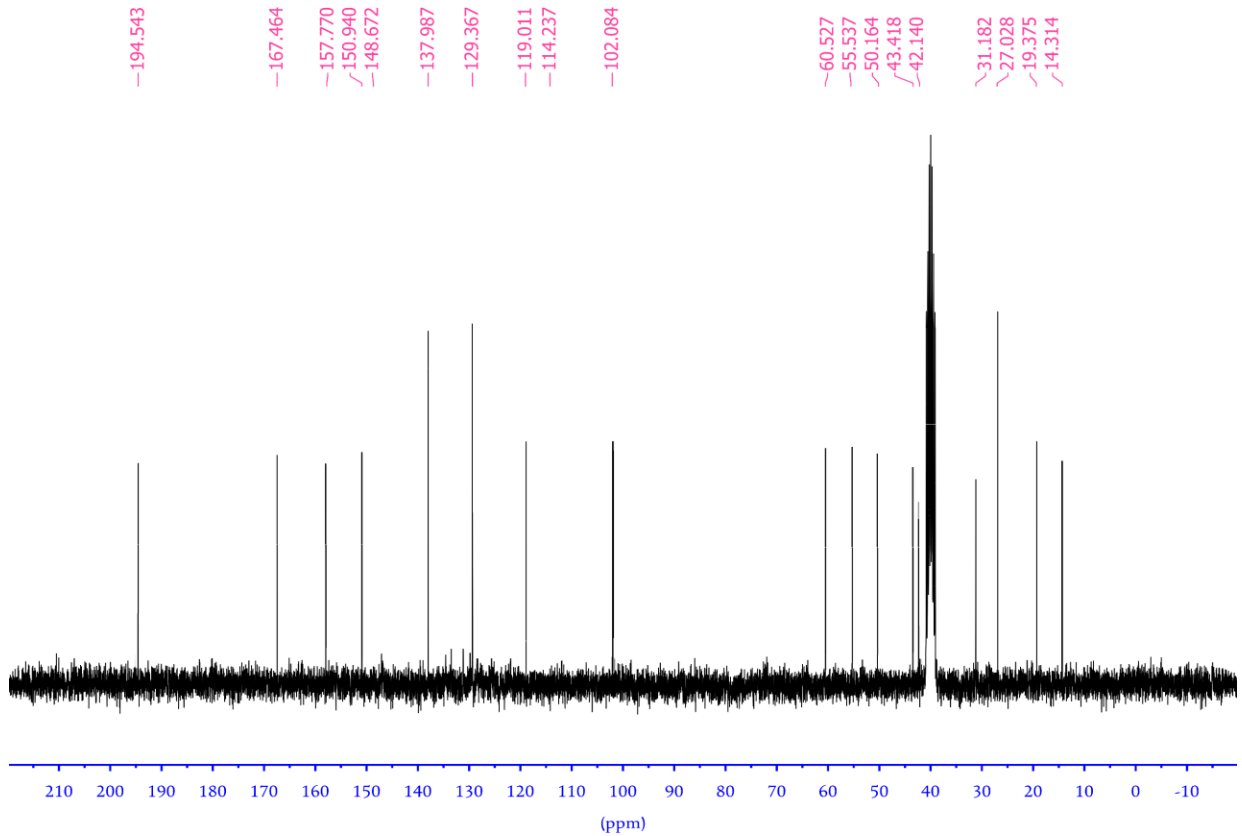

Diethyl 2,6-dimethyl-4-phenyl-1,4-dihydropyridine-3,5-dicarboxylate (6a)

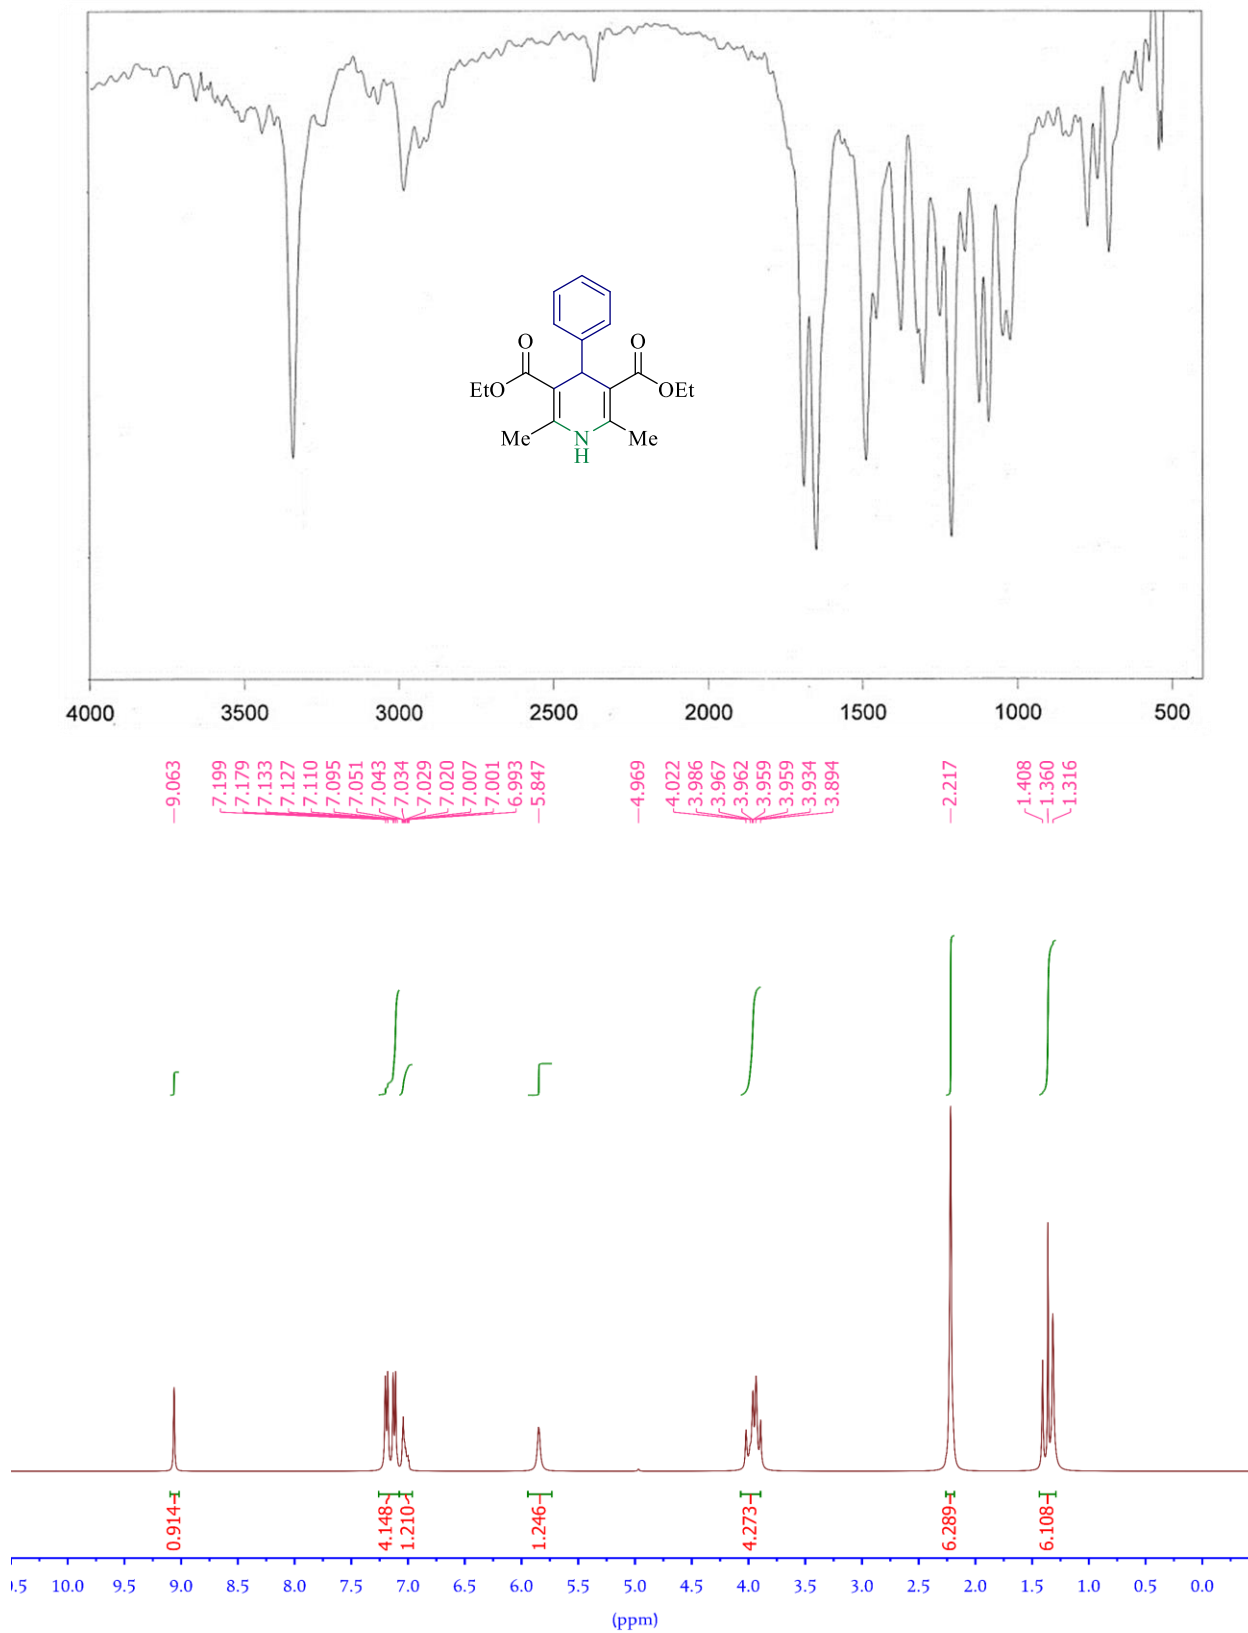

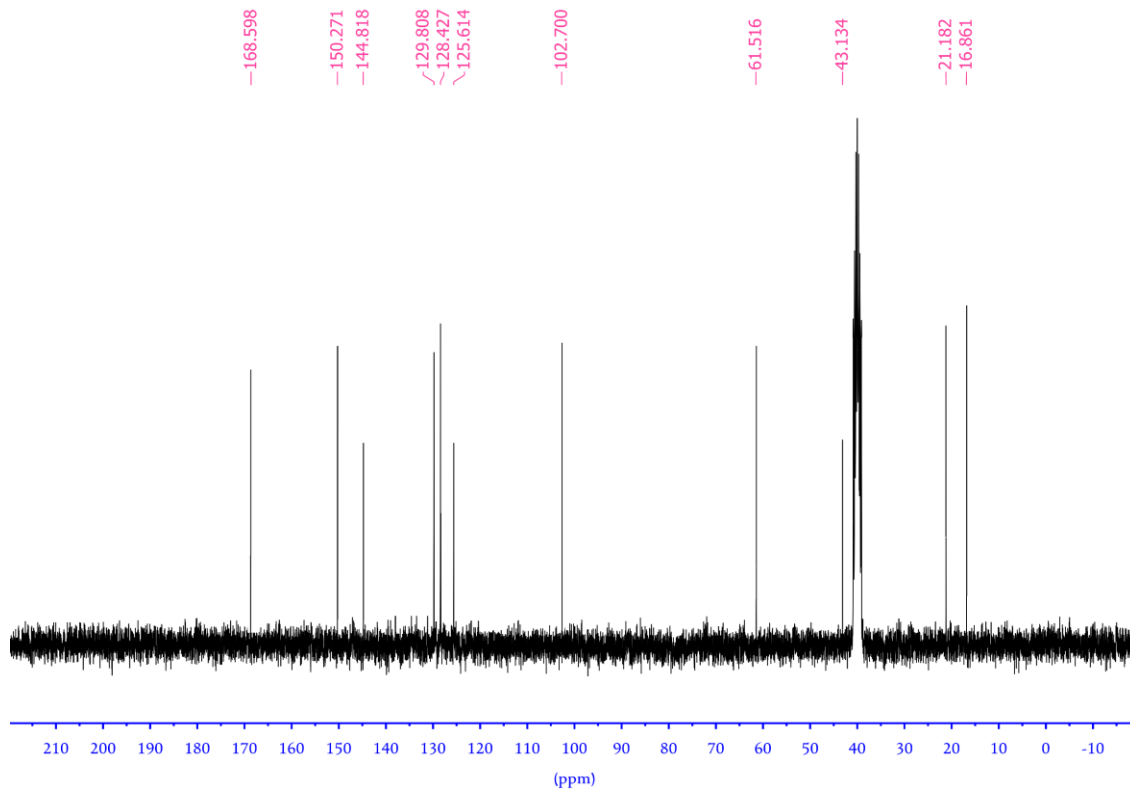

Diethyl 4-(4-chlorophenyl)-2,6-dimethyl-1,4-dihydropyridine-3,5-dicarboxylate (6c)

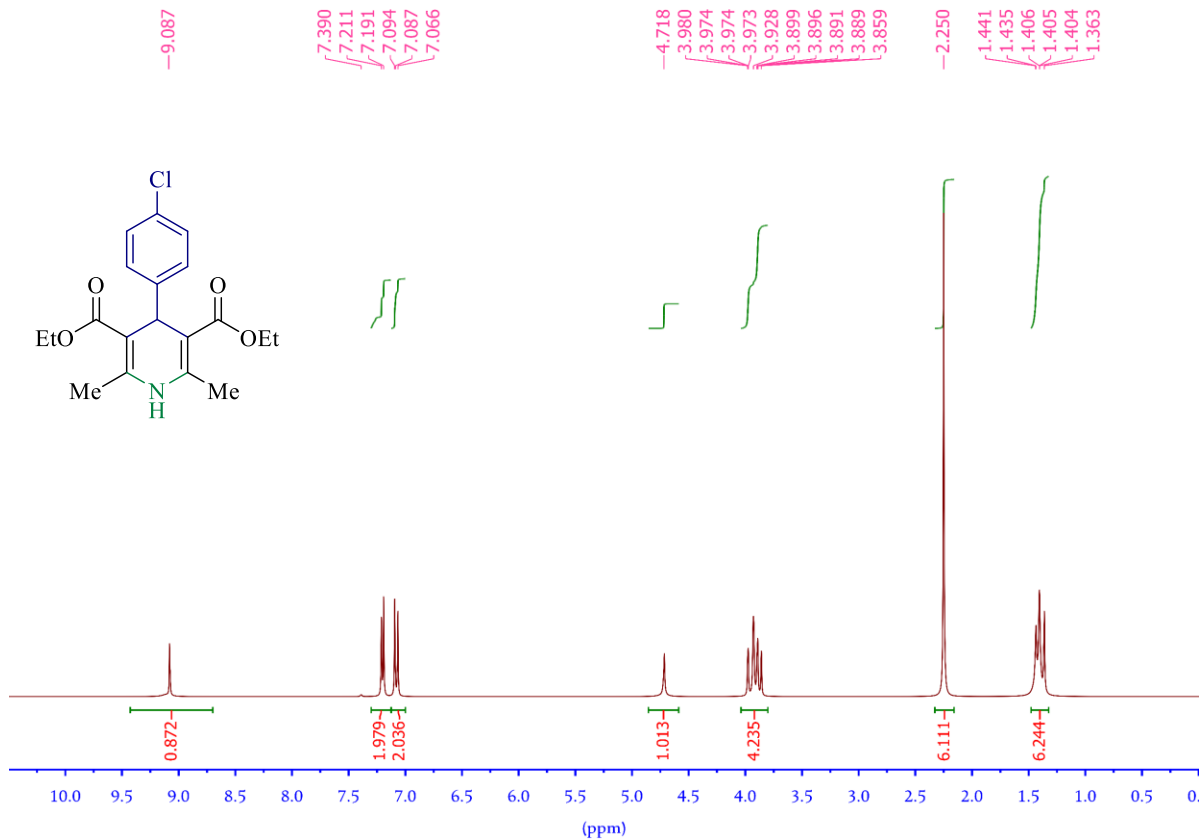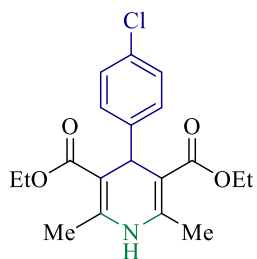

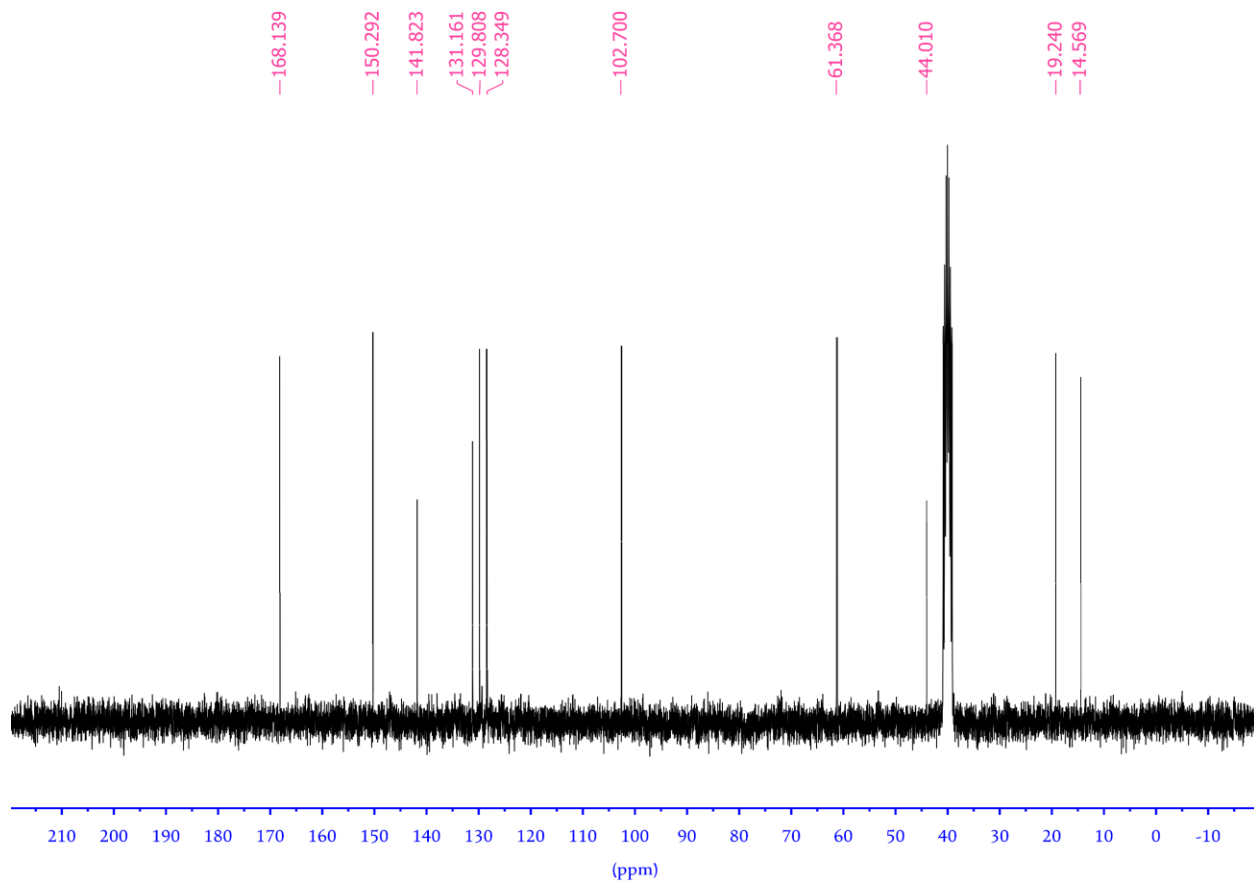

Diethyl 4-(4-methoxyphenyl)-2,6-dimethyl-1,4-dihydropyridine-3,5-dicarboxylate (6f)

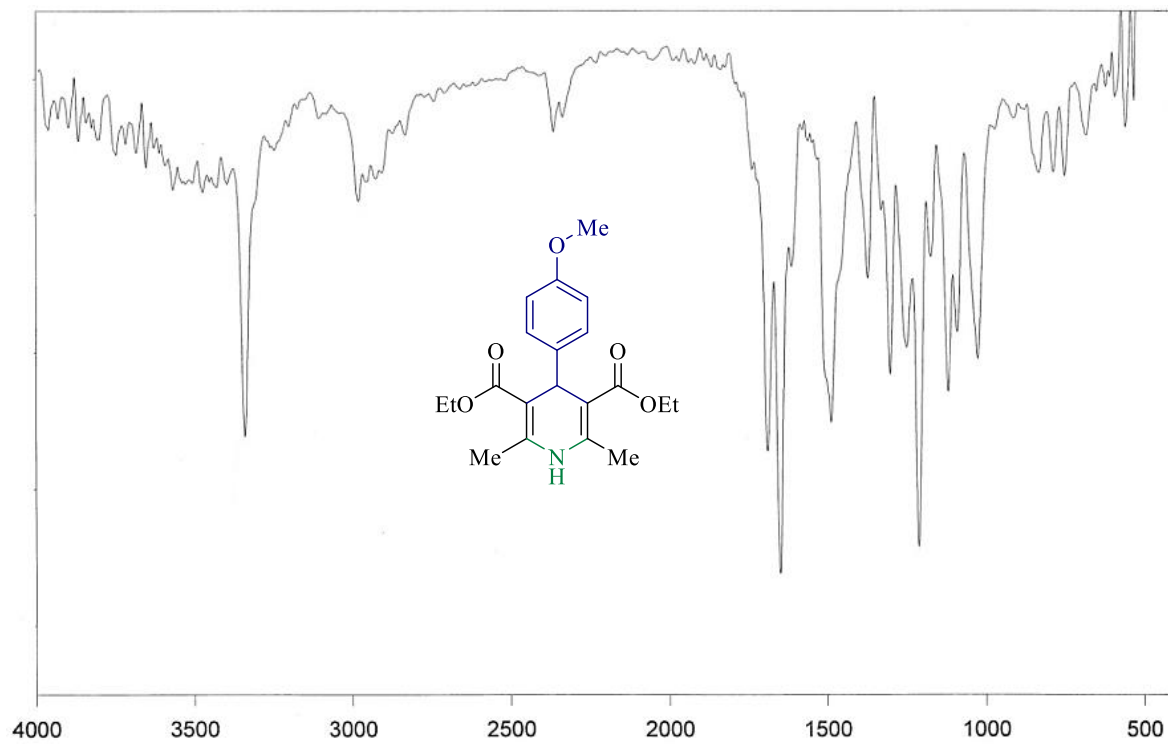

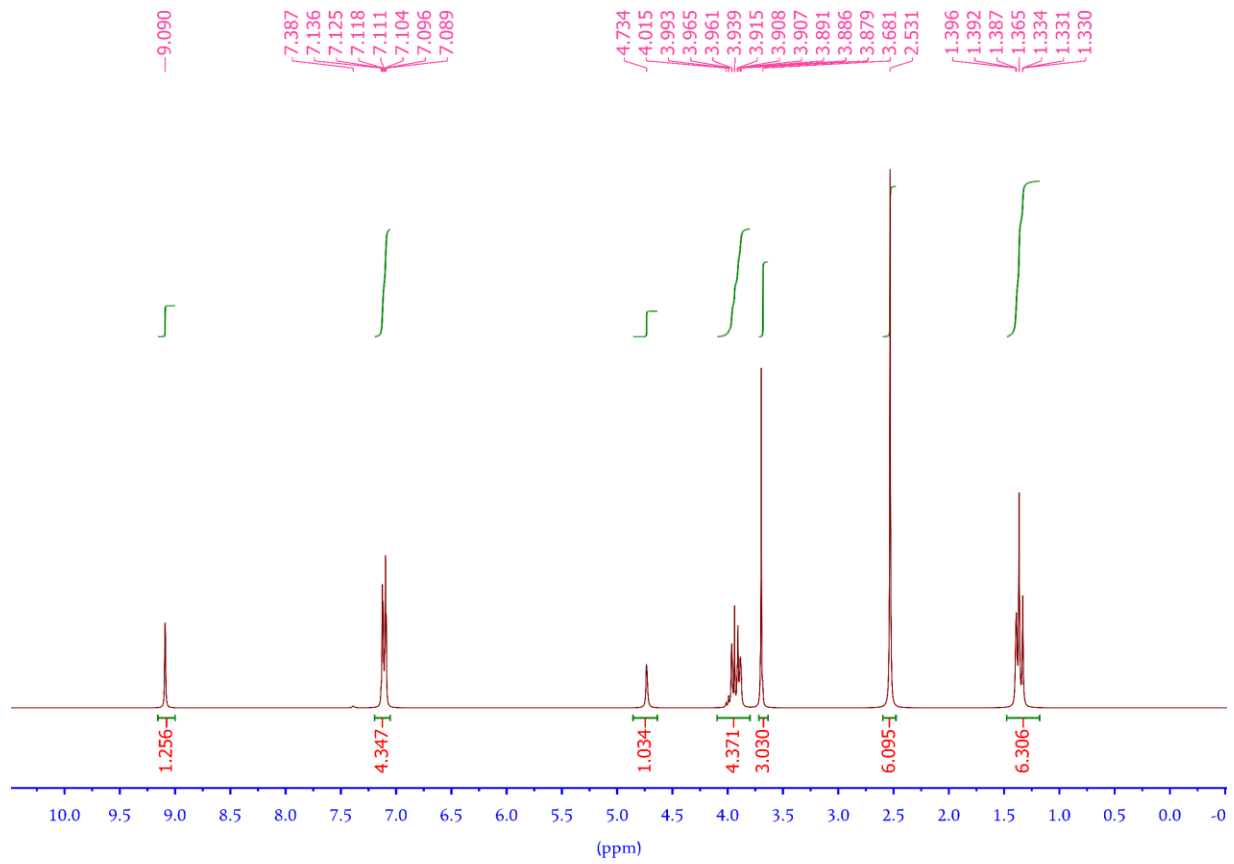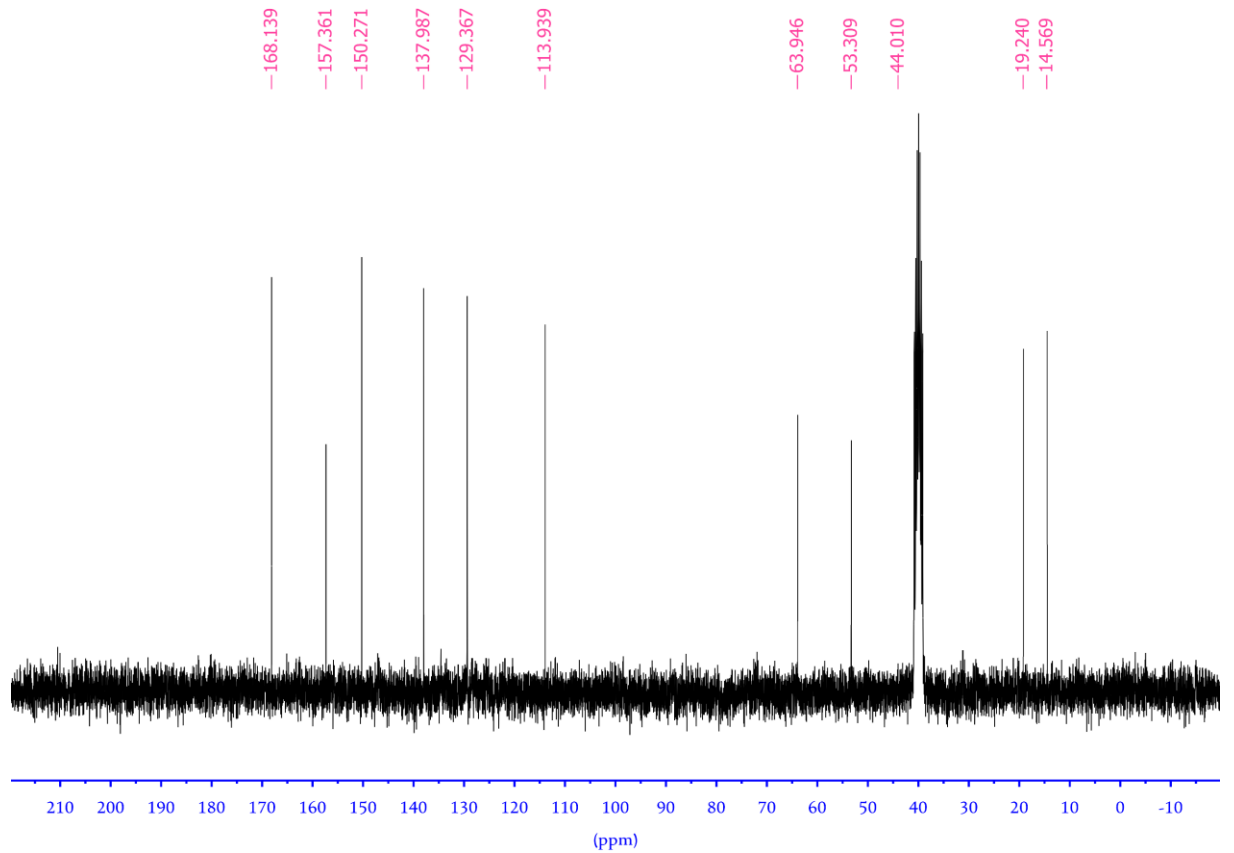

Diethyl 2,6-dimethyl-4-(4-nitrophenyl)-1,4-dihydropyridine-3,5-dicarboxylate (6i)

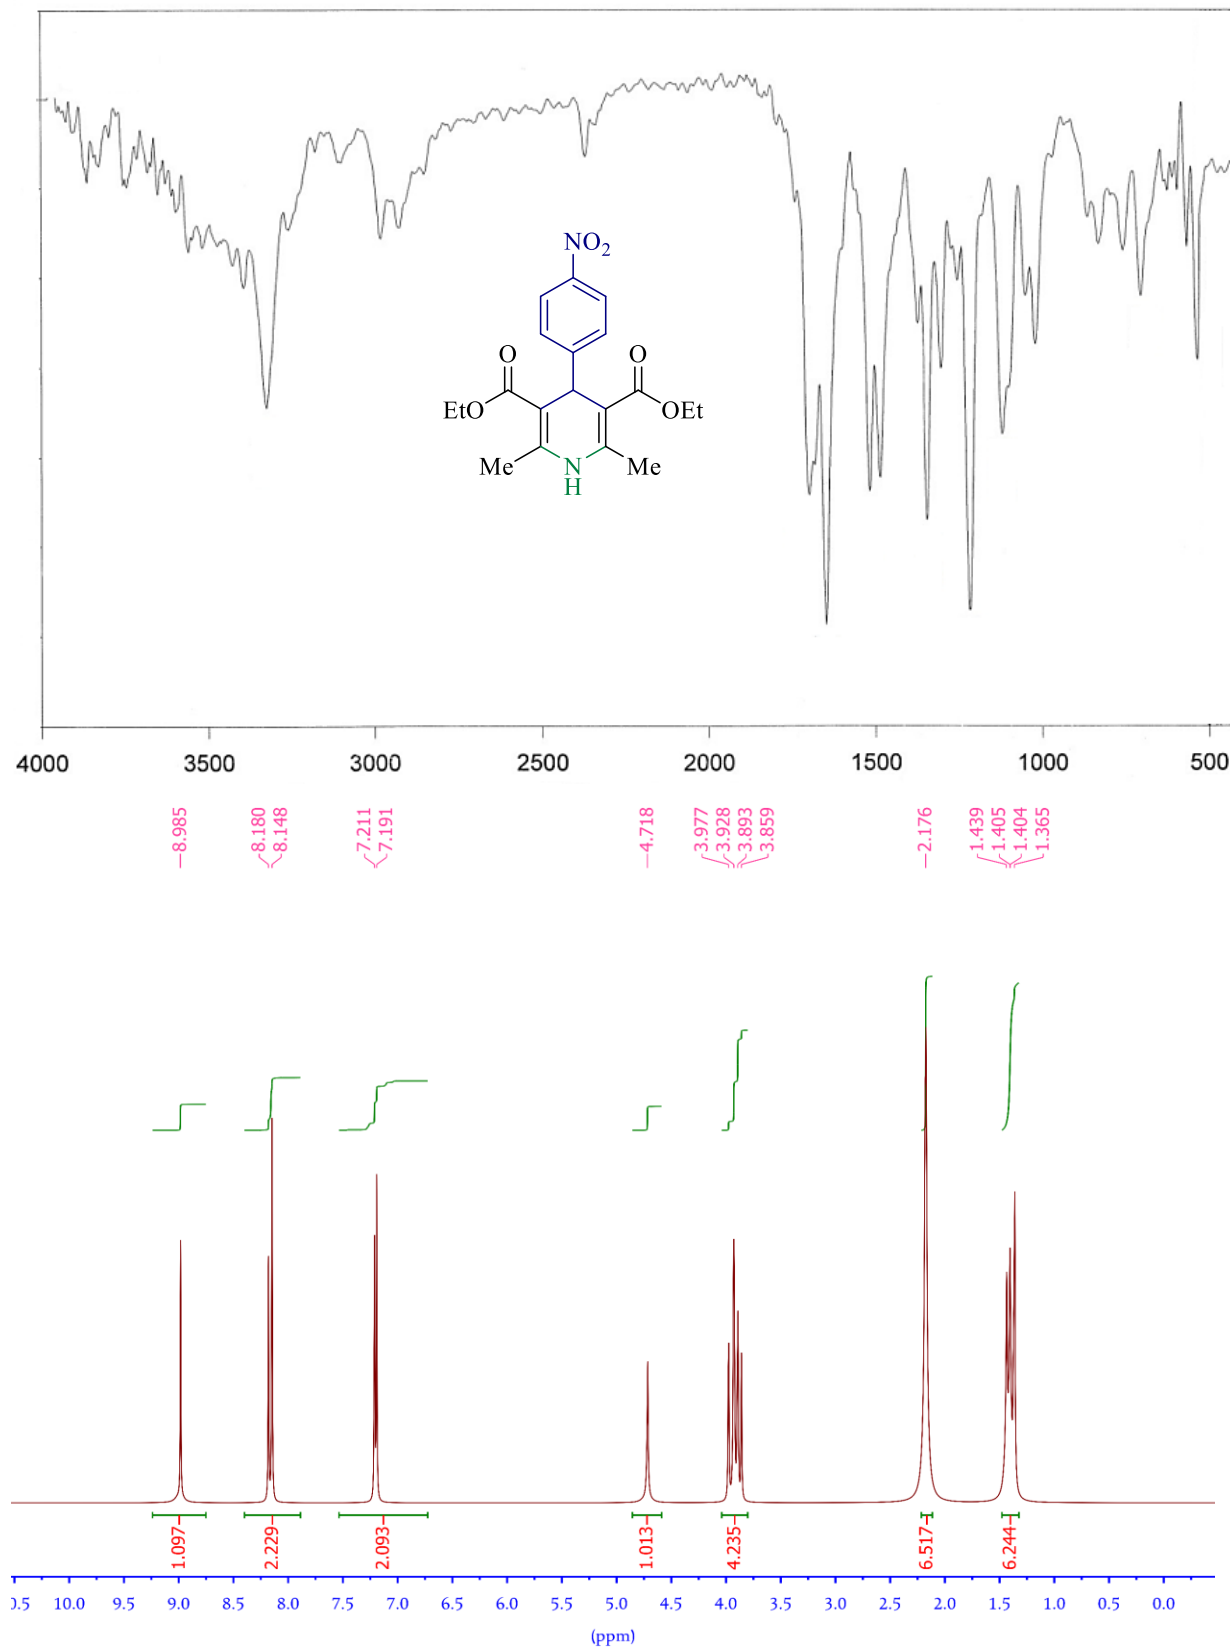

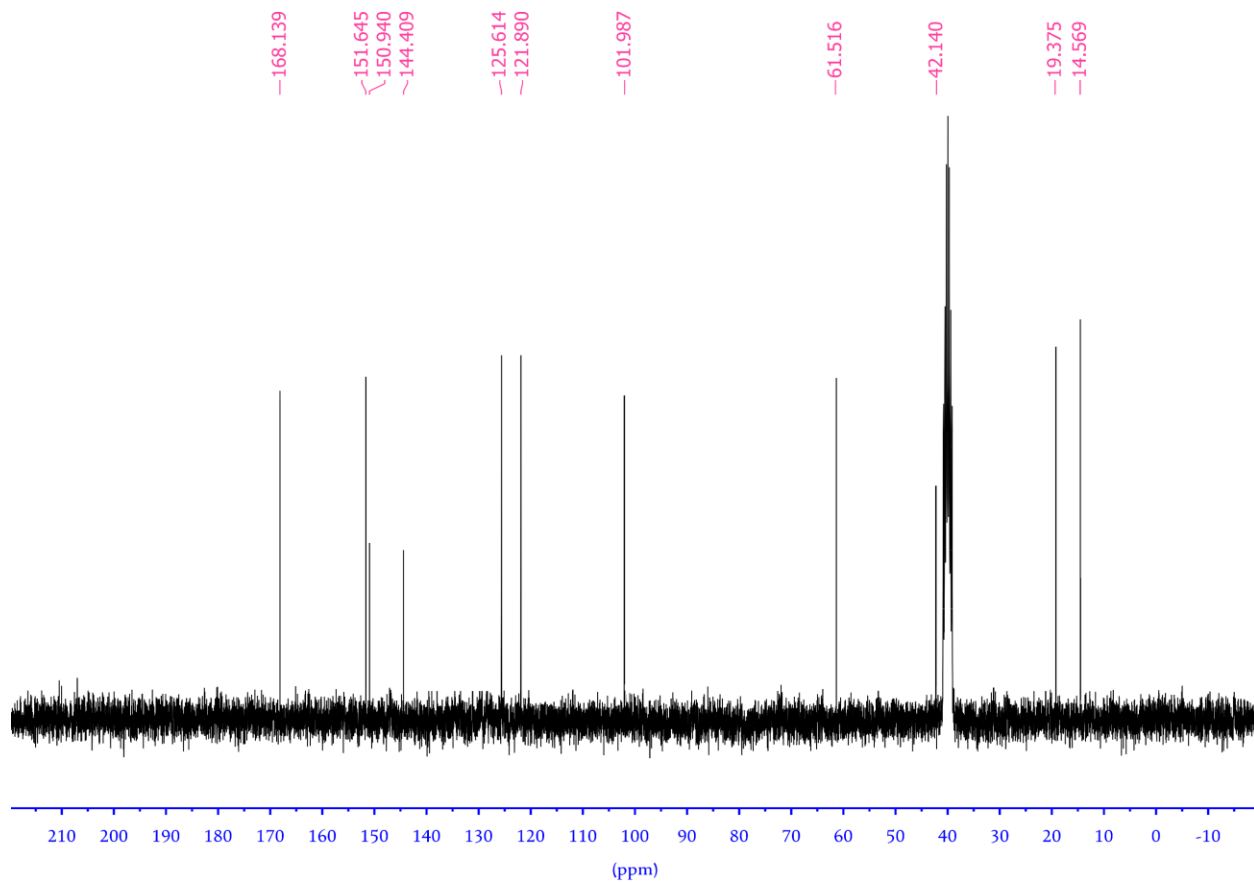

Diethyl 4-(4-cyanophenyl)-2,6-dimethyl-1,4-dihydropyridine-3,5-dicarboxylate (6j)

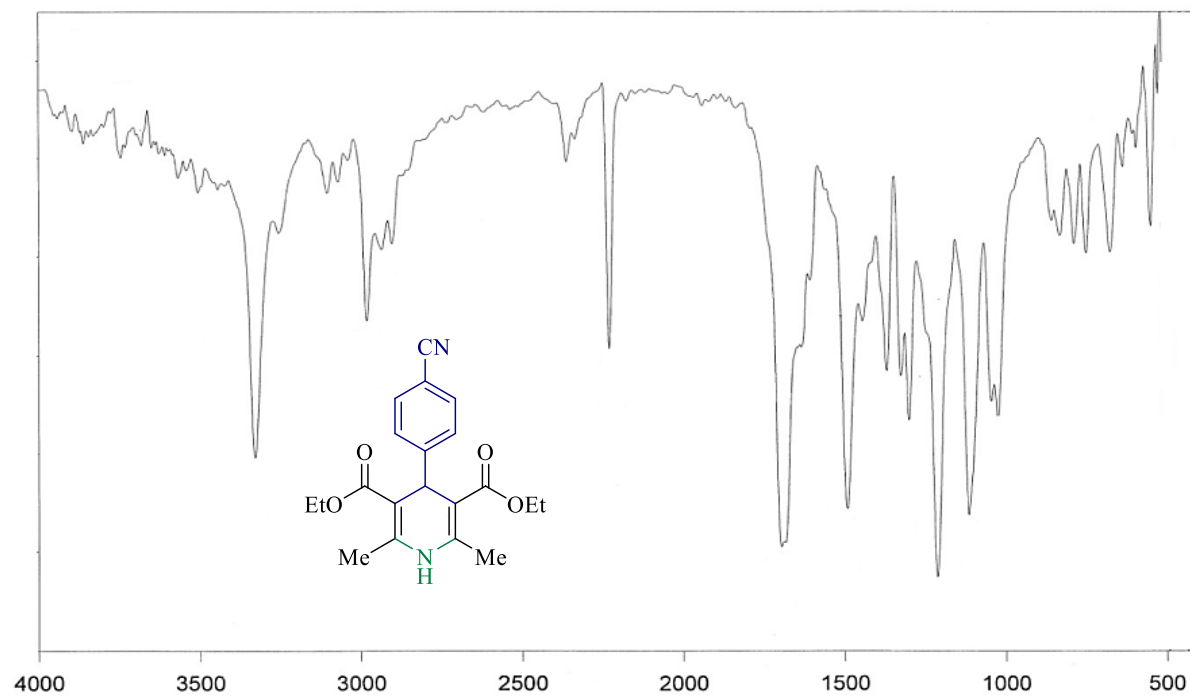

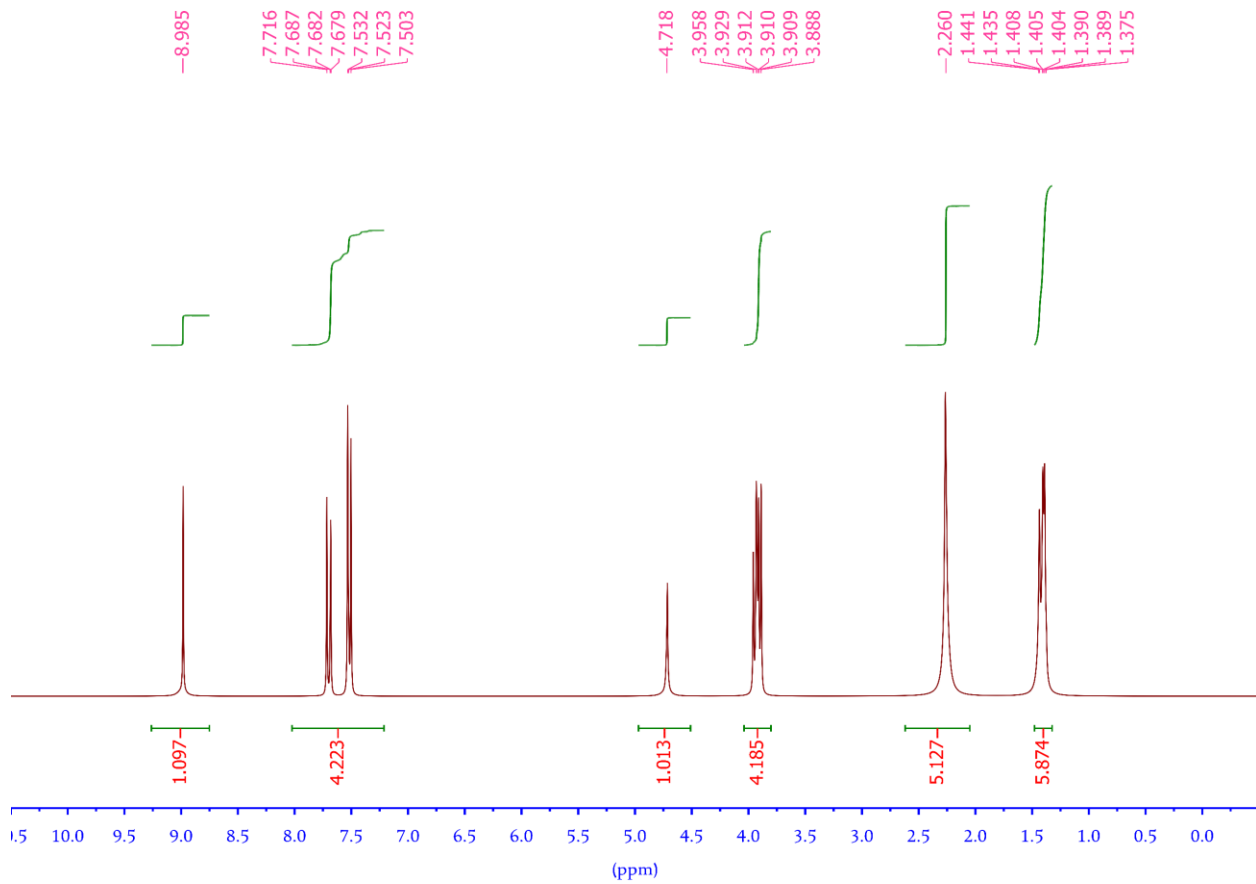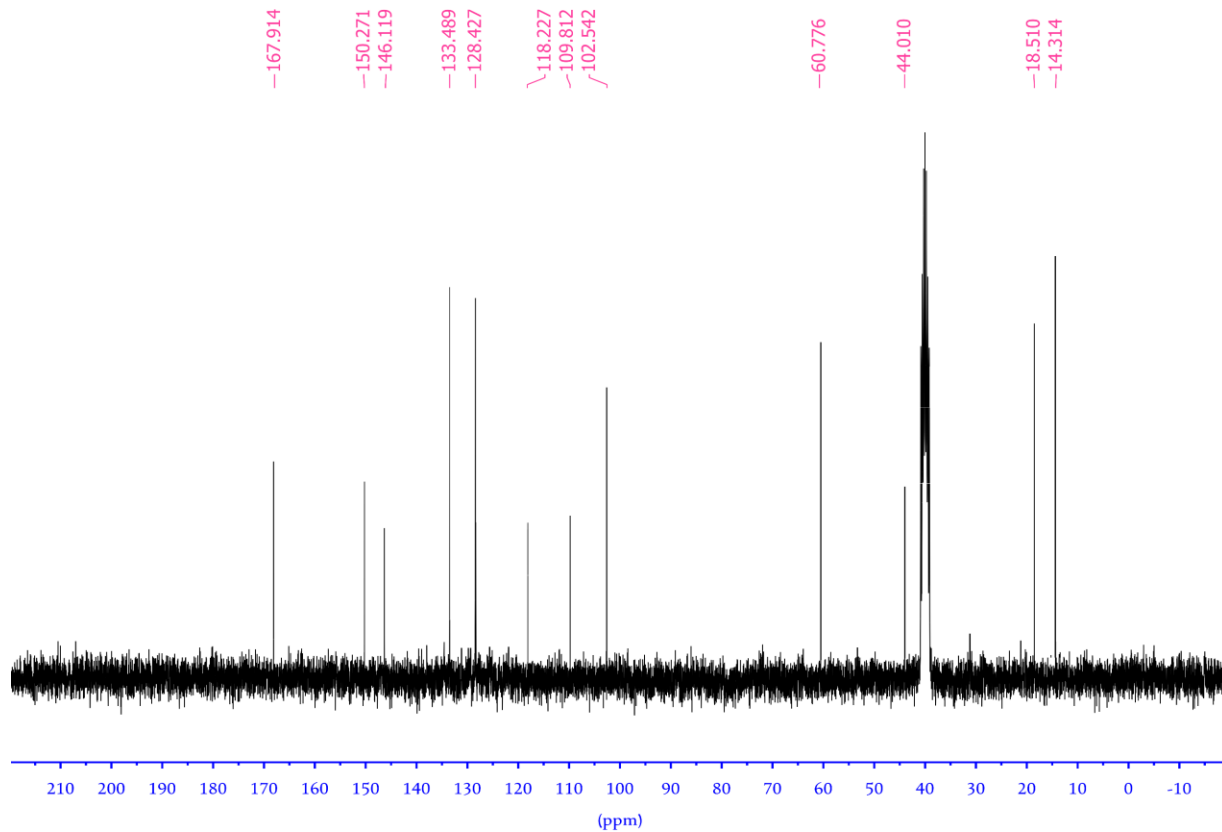

Supplement: d1ra01256h1.pdf [file d1ra01256h1.pdf]
